# Supplementary material for: A Novel Route Controlling Begomovirus Resistance by the Messenger RNA Surveillance Factor Pelota
Source: PubMed Central journal article supplement (PMC4598160; doi:10.1371/journal.pgen.1005538), 2015-10-08
Supplement: pgen.1005538.s002.pdf [file pgen.1005538.s002.pdf]

M-82 MNKGANGNQQLLELPAGFRFHPTDDELVQHLYLCRKCAGQSI AVSIIAEIDLYKFDPWQLPE 60  
TY172 MNKGANGNQQLLELPAGFRFHPTDDELVQHLYLCRKCAGQSI AVSIIAEIDLYKFDPWQLPE 60  
\*\*\*\*\*

M-82 KALYGEKEWYFFSPRDRKYPNGSRPNRAAGTGYWKATGADKPVGKPKTLGIKKALVIFYAG 120  
TY172 KALYGEKEWYFFSPRDRKYPNGSRPNRAAGTGYWKATGADKPVGKPKTLGIKKALVIFYAG 120  
\*\*\*\*\*

M-82 KAPRGIKTNWIMHEYRLANVDRSAGKNNNLRLDDWVLCRIYNKKGTTLEKHYNVDNKETTS 180  
TY172 KAPRGIKTNWIMHEYRLANVDRSAGKNNNLRLDDWVLCRIYNKKGTTLEKHYNVDNKETTS 180  
\*\*\*\*\*

M-82 FGEFDEEIKPKILPTQLAPMPRRPRSTPANDYFYFESSESMTMHTTNSSSGSEHVLSPC 240  
TY172 FGEFDEEIKPKILPTQLAPMPRRPRSTPANDCFYFESSESMTMHTTNSSSGSEHVLSPC 240  
\*\*\*\*\*

M-82 DKEVQSAPKWDEEDHRNTLDFQLNYLDGLLNEPFETQMQQQICNFDQFNNFQDMFLYMQKP 300  
TY172 DKEVQSAPKWDEEDHRNTLDFQLNYLDGLLNEPFETQMQQQICNFDQFNNFQDMFLYMQKP 300  
\*\*\*\*\*

M-82 Y 301  
TY172 Y 301
