# Supplementary material for: A Novel Route Controlling Begomovirus Resistance by the Messenger RNA Surveillance Factor Pelota
Source: PubMed Central journal article supplement (PMC4598160; doi:10.1371/journal.pgen.1005538), 2015-10-08

A

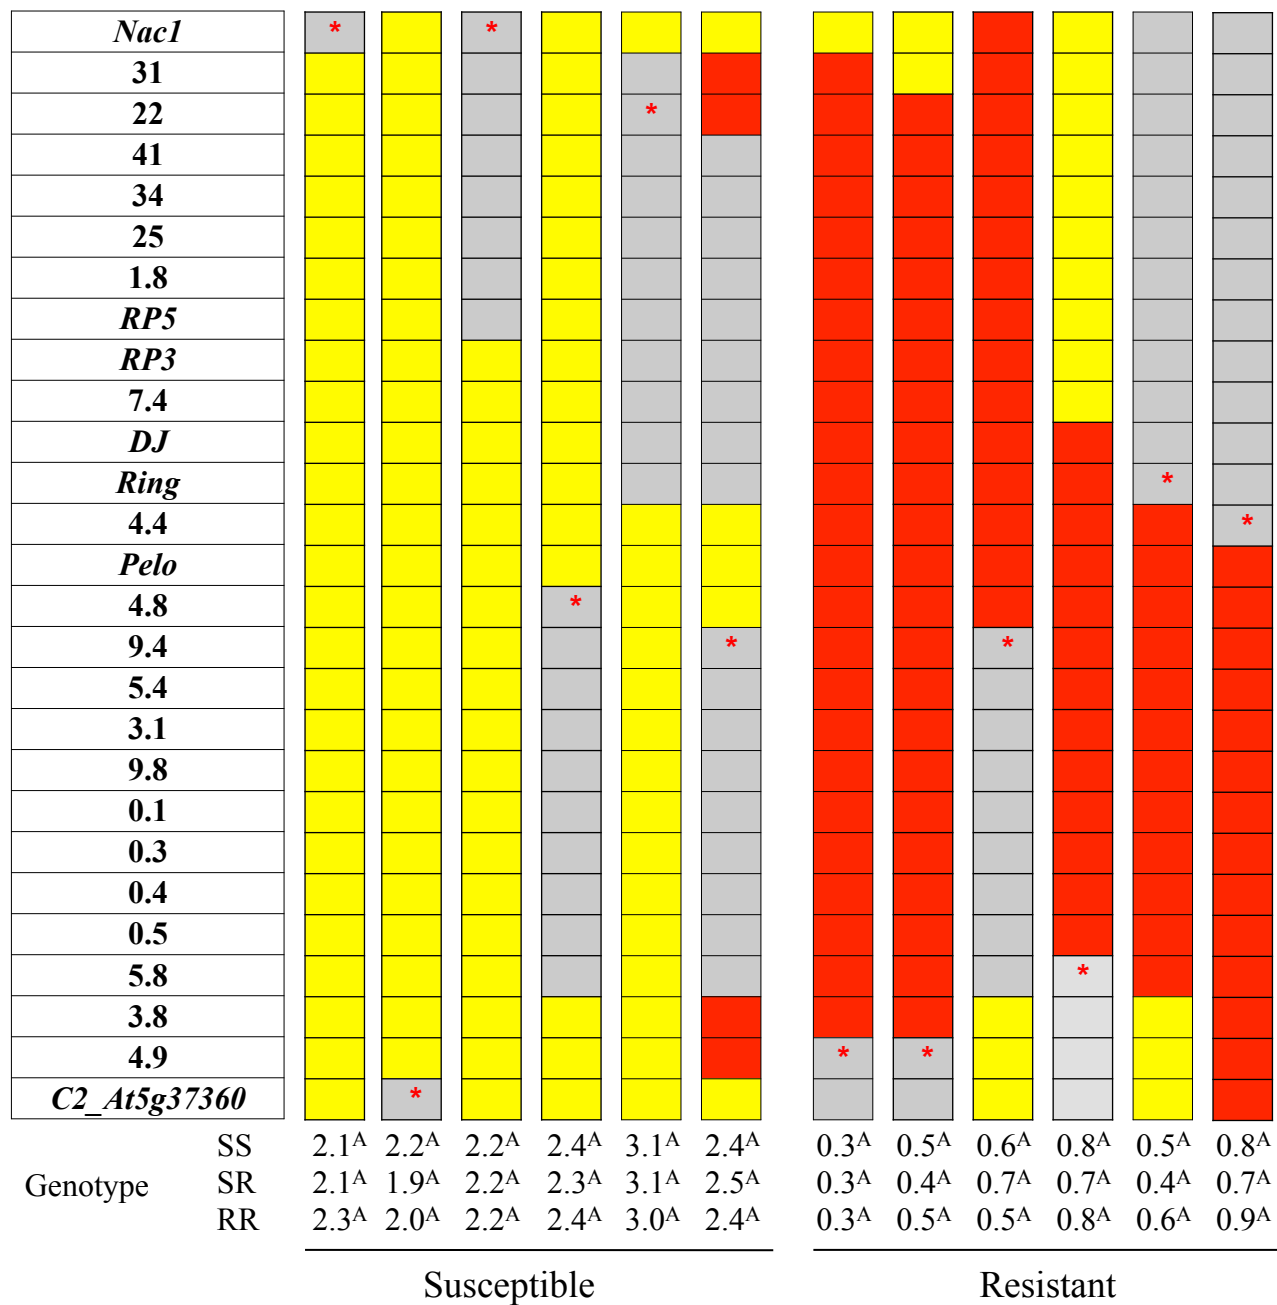

B

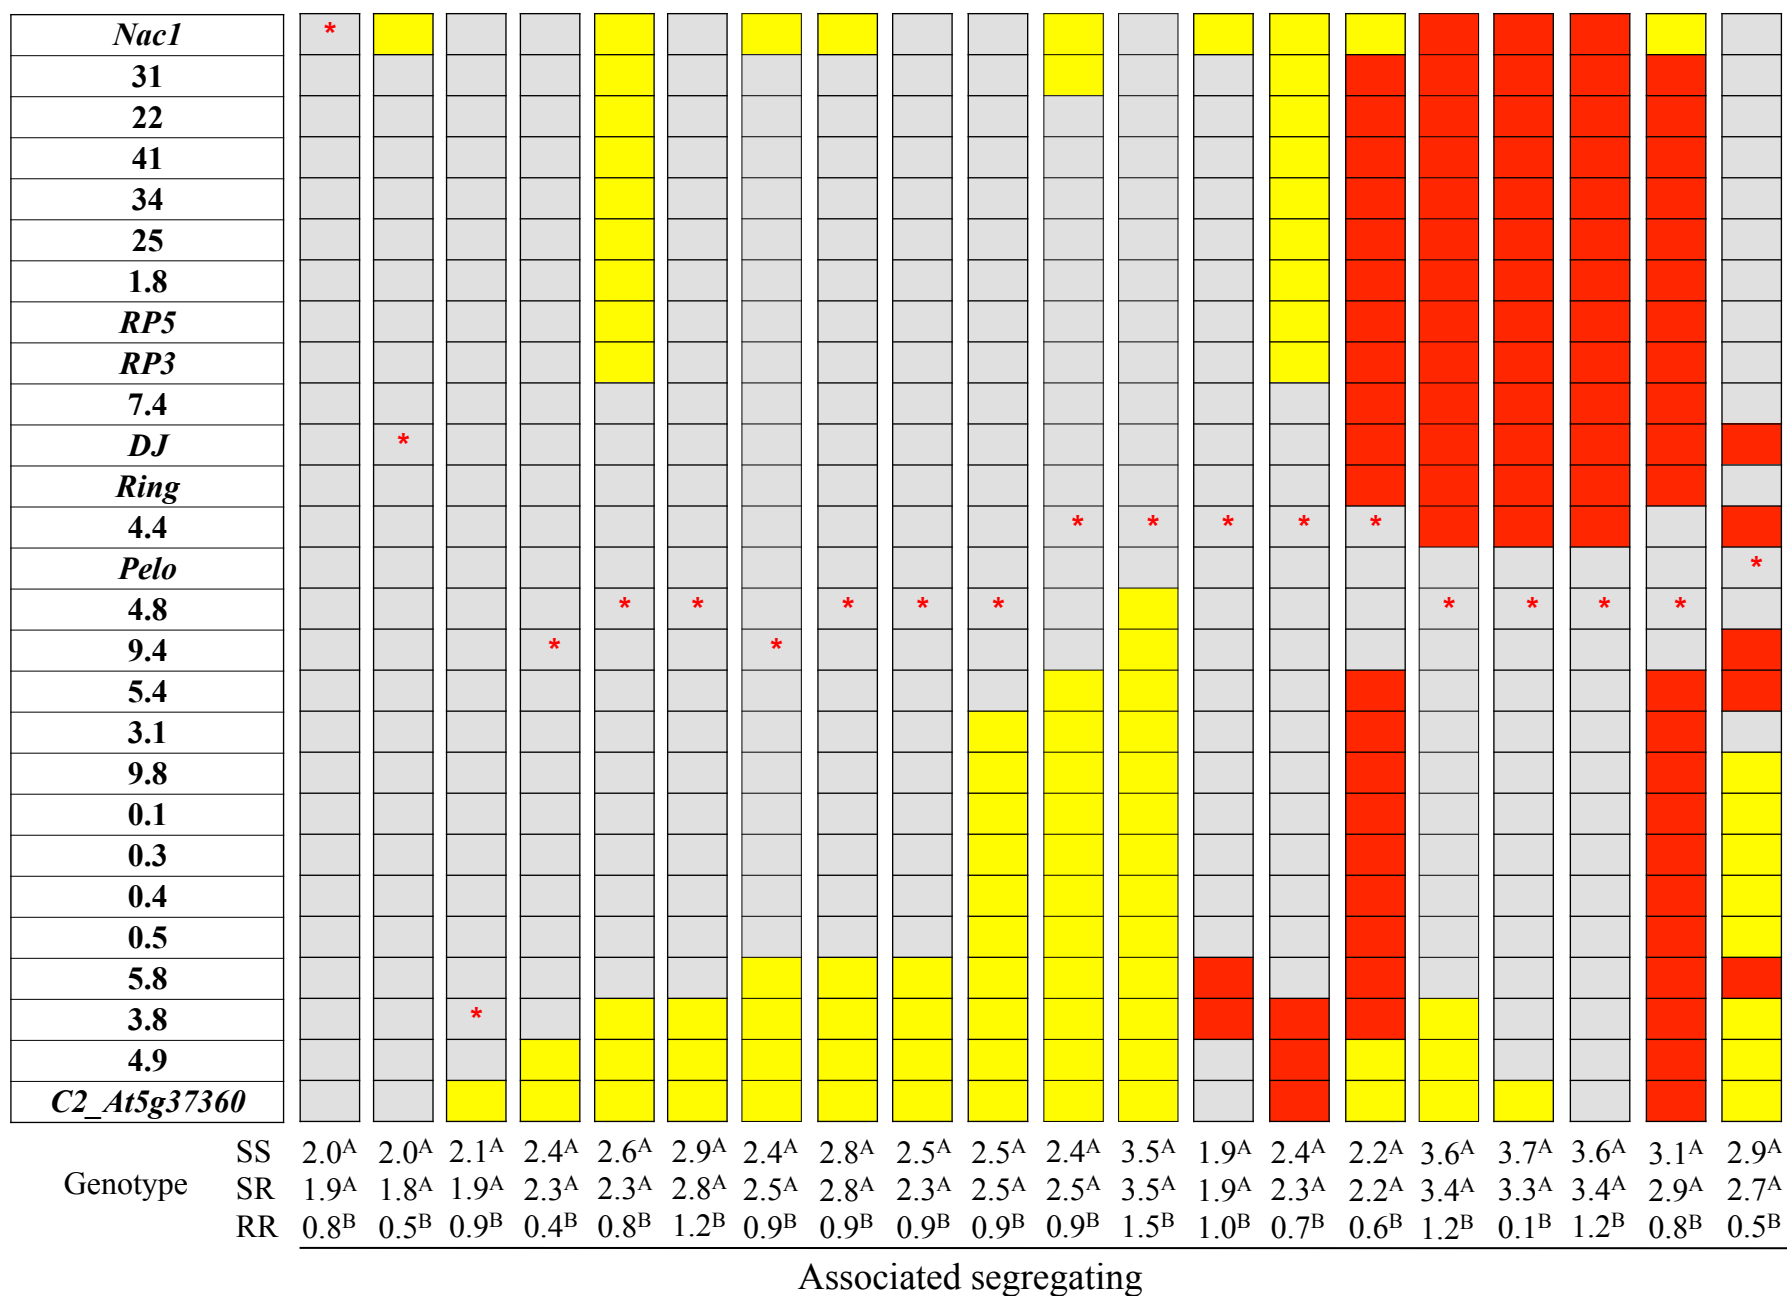

Supplement: pgen.1005538.s003.pdf [file pgen.1005538.s003.pdf]
