# Supplementary material for: A Novel Route Controlling Begomovirus Resistance by the Messenger RNA Surveillance Factor Pelota
Source: PubMed Central journal article supplement (PMC4598160; doi:10.1371/journal.pgen.1005538), 2015-10-08
Supplement: pgen.1005538.s004.pdf [file pgen.1005538.s004.pdf]

M-82 GGACGTGCATCTATAGTACTTAGTAGTAATATATCTTATATCTACATTACTTTTTTCAT 60  
TY172 AGACGTGCATCTATAGTACTTAGTAGTAATATATCTTATATCTACATTACTTTTTTCAT 60  
\*\*\*\*\*

M-82 GTCTGAAATTGACCTCTACAAATAGTTATAAATAACACTTTTGGCGTTTCAATTTTTTTA 120  
TY172 GTCTGAAATTGACCTCTACAAATAGTTATAAATAACACTTTTGGCGTTTCAATTTTTTTA 120  
\*\*\*\*\*

M-82 ATAAATCAAATTTCTCAAATGTCATATTGGTAATTCTTATATTTATTTTAGCACTGCAAG 180  
TY172 ATAAATCAAATTTCTCAAATGTCATATTGGTAATTCTTATATTTATTTTAGCACTGCAAG 180  
\*\*\*\*\*

M-82 TGTGTGTGTATATATATATATATATATATATATTATTAGTAGGTTTCGATGTTAAGAATCT 240  
TY172 TGTGTGTGTATATATATATATATATATATATTATTAGTAGGTTTCGATGTTAAGAATCT 240  
\*\*\*\*\*

M-82 AAAGGTCAAATTAGTCCAATTTATATTGTAGATTCATTTTTTCAAAGTAGTGCCTCATC 300  
TY172 AAAGGTCAAATTAGTCCAATTTATATTGTAGATTCATTTTTTCAAAGTAGTGCCTCATC 300  
\*\*\*\*\*

M-82 CTTTCGAAATCCTAGATACTCTGTTTCAGATCCTATAATTGTAATAAAAAATTATGTTAA 360  
TY172 CTTTCGAAATCCTAGATACTCTGTTTCAGATCCTATAATTGTAATAAAAAATTATGTTAA 360  
\*\*\*\*\*

M-82 TATGTATAAGTAGATAATAATGTATTTTGAACCTAATAAATTAAGAAGTATATGATTGAA 420  
TY172 TATGTATAAGTAGATAATAATGTATTTTGAACCTAATAAATTAAGAAGTATATGATTGAA 420  
\*\*\*\*\*

M-82 AATACATAAATTTAACCTTTTGGATCCATCACTAAATTATACATCATTCTTGAGCATGAA 480  
TY172 AATACATAAATTTAACCTTTTGGATCCATCACTAAATTATACATCATTCTTGAGCATGAA 480  
\*\*\*\*\*

M-82 AAAAAAGACAACAAAACGAAATTCAGTGAATATATGTGAAGTGTGAAGTTATGGTTGG 540  
TY172 AAAAAAGACAACAAAACGAAATTCAGTGAATATATGTGAAGTGTGAAGTTATGGTTGG 540  
\*\*\*\*\*

M-82 CCCAATATTAGGCCAATGTCATGGTTGGCTCAATTTTAGGCCAATATCATGGTCCCCT 600  
TY172 CCCAATATTAGGCCAATGTCATGGTTGGCTCAATTTTAGGCCAATATCATGGTCCCCT 600  
\*\*\*\*\*

M-82 TCAAATTGCTTCTCATGGGCCAACATGGACAAAAGAGGAAAAAAAAAACAACACTAGAG 660  
TY172 TCAAATTGCTTCTCATGGGCCAACATGGACAAAAGAGGAAAAAAAAAACAACACTAGAG 660  
\*\*\*\*\*

M-82 GTTTATACTCGTACACAACGTAATCCATAAGTAGAGTCTGAATAGAGTGATGTGTACAC 720  
TY172 GTTTATACTCGTACACAACGTAATCCATAAGTAGAGTCTGAATAGAGTGATGTGTACAC 720  
\*\*\*\*\*

M-82 AACTTTACCCTACCTTGTGAAGGTAGAGAGTTTGTTCGTTAAACCCTTTATTGGAGTA 780  
TY172 AACTTTACCCTACCTTGTGAAGGTAGAGAGTTTGTTCGTTAAACCCTTTATTGGAGTA 780  
\*\*\*\*\*

M-82 AACATATCAAAAATCAAGTATATAAGGCAAAAACAGTTGAGAAAAAAAAAACATGCTGAA 840  
TY172 AACATATCAAAAATCAAGTATATAAGGCAAAAACAGTTGAGAAAAAAAAAACATGCTGAA 840  
\*\*\*\*\*

M-82 AATAACTAAAAAGCCAACAAGTAGCAACACCAATAATATGATAATCGAAAAGATATAAC 900  
TY172 AATAACTAAAAAGCCAACAAGTAGCAACACCAATAATATGATAATCGAAAAGATATAAC 900  
\*\*\*\*\*

M-82 CTATTGATAAGAGAAGCTAGACAATACTCAACTACATGCTAACTTTTATACCCTAATTCTCA 960  
TY172 CTATTGATAAGAGAAGCTAGACAATACTCAACTACATGCTAACTTTTATACCCTAATTCTCA 960  
\*\*\*\*\*

M-82 ACCTTTATATCTTTGTATCTACAATCATGTTCTCGGTAAGCTGCAGATATTATATATTCA 1020  
TY172 ACCTTTATATCTTTGTATCTACAATCATGTTCTCGGTAAGCTGCAGATATTATATATTCA 1020  
\*\*\*\*\*

M-82 GTCTAATTAGCTCACCCAAAAATCGTTTCAATCTACCTCTACCTCTTATGATACCTTACT 1080  
TY172 GTCTAATTAGCTCACCCAAAAATCGTTTCAATCTACCTCTACCTCTTATGATACCTTACT 1080  
\*\*\*\*\*

M-82 ATATCCAACCTCTGACACTTCCTCGAAAGGGTATCCATACATTTTCTCTTCACATGTCCA 1140  
TY172 ATATCCAACCTCTGACACTTCCTCGAAAGGGTATCCATACATTTTCTCTTCACATGTCCA 1140  
\*\*\*\*\*

M-82 AACCTTCCCAGCCTCATCTCTCATCCTGTGCGACCACATAAATTAACCATTCTCACTTT 1200  
TY172 AACCTTCCCAGCCTCATCTCTCATCCTGTGCGACCACATAAATTAACCATTCTCACTTT 1200  
\*\*\*\*\*

M-82 ATCTCCAATAACTTCATTCTTGATCCTATTTCTTCTAAATGCACACACGTTTATTTTAAAT 1260  
TY172 ATCTCCAATAACTTCATTCTTGATCCTATTTCTTCTAAATGCACACACGTTTATTTTAAAT 1260  
\*\*\*\*\*

M-82 ATCCTTATTTTTGCTACGTTTAAATTTTTAAACATGTGATTTTTTTTTACTAATCAGTATT 1320  
TY172 ATCCTTATTTTTGCTACGTTTAAATTTTTAAACATGTGATTTTTTTTTACTAATCAGTATT 1320  
\*\*\*\*\*

M-82 AAGCTTTTTAATGTTACATTTTAAATCGCACAAAACCTCTAGATGTAAATATATGCTTCATCC 1380  
TY172 AAGCTTTTTAATGTTACATTTTAAATCGCACAAAACCTCTAGATGTAAATATATGCTTCATCC 1380  
\*\*\*\*\*

M-82 ACCTGTTTCAATACTAAGATAACATCATCATCAGTCTCCTCCTAATTATTTTTTTTATAA 1440  
TY172 ACCTGTTTCAATACTAAGATAACATCATCATCAGTCTCCTCCTAATTATTTTTTTTATAA 1440  
\*\*\*\*\*

M-82 CTAATTAAGTATGACATAAATTGATTTATTTTTTCAATTTGAATCAGGTCTAATCAAGTGGA 1500  
TY172 CTAATTAAGTATGACATAAATTGATTTATTTTTTCAATTTGAATCAGGTCTAATCAAGTGGA 1500  
\*\*\*\*\*

M-82 AGAGGCAAAACAAAATTAGTTGAGACAATTTTTTTTTTAAAGTCATATTACATTAAAAAA 1560  
TY172 AGAGGCAAAACAAAATTAGTTGAGACAATTTTTTTTTTAAAGTCATATTACATTAAAAAA 1560  
\*\*\*\*\*

M-82 AAAA-TAGGAAAAAATTACTTAAAGGGGATACTAATAAATAACACTAATATTAGCAATACT 1619  
TY172 AAAAATAGGAAAAAATTACTTAAAGGGGATACTAATAAATAACACTAATATTAGCAATACT 1620  
\*\*\*\*\*

M-82 TCTCGTTTTATTATCATTATAGCCATATATAACAATACTATGATAAATGCAATACTATGT 1679  
TY172 TCTCGTTTTATTATCATTATAGCCATATATAACAATACTATGATAAATGCAATACTATGT 1680  
\*\*\*\*\*

M-82 ATTA AAAAGTATATCATGTATGAAATATATGTGTATTATAACCGTTTTATAATATATTAT 1739  
TY172 ATTA AAAAGTATATCATGTATGAAATATATGTGTATTATAACCGTTTTATAATATATTAT 1740  
\*\*\*\*\*

M-82 GTTTGTGGTAAGCTATTGACACATTGTATTATGTGTATTAATATGTTTTATCCACCAA 1799  
TY172 GTTTGTGGTAAGCTATTGACACATTGTATTATGTGTATTAATATGTTTTATCCACCAA 1800  
\*\*\*\*\*

M-82 TY172 TAAACTTGTATTATATGTATTTTATAAATTCCTTCTTATTAAAACGTATTATAAATGTA 1859  
TAAACTTGTATTATATGTATTTTATAAATTCCTTCTTATTAAAACGTATTATAAATGTA 1860  
\*\*\*\*\*

M-82 TY172 TTAAAAATTATCAAGTGAAAGTAAAATTATTACTATAAATGGTAAATACTTTTCTAATAT 1919  
TTAAAAATTATCAAGTGAAAGTAAAATTATTACTATAAATGGTAAATACTTTTCTAATAT 1920  
\*\*\*\*\*

M-82 TY172 TACATATTTATGAAAGTTTTCCAAAAATATACTTTTTTTTTTAAAAAATAATCCATAA 1979  
TACATATTTATGAAAGTTTTCCAAAAATATACTTTTTTTTTTAAAAAATAATCCATAA 1980  
\*\*\*\*\*

M-82 TY172 ATATAAATTTGTTAAAAGAAAAGGTAAAGAAACATCATATATAACACAACAAATATATAA 2039  
ATATAAATTTGTTAAAAGAAAAGGTAAAGAAACATCATATATAACACAACAAATATATAA 2040  
\*\*\*\*\*

M-82 TY172 AAAAATATTTTTAAAATAAAAATATACTAATTTTTAAATTGCAAAATTGAGGGTATATTGG 2099  
AAAAATATTTTTAAAATAAAAATATACTAATTTTTAAATTGCAAAATTGAGGGTATATTGG 2100  
\*\*\*\*\*

M-82 TY172 TCATTTTCTCCCAAAAAATAAAAATTCAAGTCCTTCTTCAACAAGGTTAGGAAAAACCT 2159  
TCATTTTCTCCCAAAAAATAAAAATTCAAGTCCTTCTTCAACAAGGTTAGGAAAAACCT 2160  
\*\*\*\*\*

M-82 TY172 AAAACATTTAAAAGGACACAAACCGTTAAAACCTATAAAAAGTCTTTTCTCCATTGAACTG 2219  
AAAACATTTAAAAGGACACAAACCGTTAAAACCTATAAAAAGTCTTTTCTCCATTGAACTG 2220  
\*\*\*\*\*

M-82 TY172 AAGCAAATCTCATACGAAAAAATTCTATAAAAAGTTGTTTAAATTCATCTTTTTTTCTG 2279  
AAGCAAATCTCATACGAAAAAATTCTATAAAAAGTTGTTTAAATTCATCTTTTTTTCTG 2280  
\*\*\*\*\*

M-82 TY172 CTATTTACATGCAAAATTATTGAATTTTTTCATTAAGTTGATAAATTTGTTTCATTCAATA 2339  
CTATTTACATGCAAAATTATTGAATTTTTTCATTAAGTTGATAAATTTGTTTCATTCAATA 2340  
\*\*\*\*\*

M-82 TY172 TGAAGATTGTTTCGTAGAGACTTTGTTCTGATGGTTCTGGTAGTGTAAAGGTAACCTTTTT 2399  
TGAAGATTGTTTCGTAGAGACTTTGTTCTGATGGTTCTGGTAGTGTAAAGGTAACCTTTTT 2400  
\*\*\*\*\*

M-82 TY172 TATCTCTATAATTGTTGTTTAAATCTATAATTCGAGTAATTTTCGTGATTTTTTGAACC 2459  
TATCTCTATAATTGTTGTTTAAATCTATAATTCGAGTAATTTTCGTGATTTTTTGAACC 2460  
\*\*\*\*\*

M-82 TY172 CCAGATGAAGAAAACGTTAAAATTGATTTGGGTATTTTTTATTTTTTAAATTTTCATGTGT 2519  
CCAGATGAAGAAAACGTTAAAATTGATTTGGGTATTTTTTATTTTTTAAATTTTCATGTGT 2520  
\*\*\*\*\*

M-82 TY172 TATACAGATAATTCAGAAGAAGCTGATGATCTATGGGTTGCTTATAATCTGATAGCTGA 2579  
TATACAGATAATTCAGAAGAAGCTGATGATCTATGGGTTGCTTATAATCTGATAGCTGA 2580  
\*\*\*\*\*

M-82 TY172 AGGTGATACTGTATTAGCTGTTACTGTTAGGTATTGCACCTTTTGCTCAATTTTATTAGTG 2639  
AGGTGATACTGTATTAGCTGTTACTGTTAGGTATTGCACCTTTTGCTCAATTTTATTAGTG 2640  
\*\*\*\*\*

M-82 TY172 TGAGGGCTTAGCATTATTAGCAATTTTTTTGGGATAAATAAGTAATTTTTTATTCGCGTAT 2699  
TGAGGGCTTAGCATTATTAGCAATTTTTTTGGGATAAATAAGTAATTTTTTATTCGCGTAT 2700  
\*\*\*\*\*

M-82 2759  
TY172 2760  
\*\*\*\*\*

M-82 2819  
TY172 2820  
\*\*\*\*\*

M-82 2879  
TY172 2880  
\*\*\*\*\*

M-82 2939  
TY172 2940  
\*\*\*\*\*

M-82 2999  
TY172 3000  
\*\*\*\*\*

M-82 3059  
TY172 3060  
\*\*\*\*\*

M-82 3119  
TY172 3120  
\*\*\*\*\*

M-82 3179  
TY172 3180  
\*\*\*\*\*

M-82 3239  
TY172 3240  
\*\*\*\*\*

M-82 3299  
TY172 3300  
\*\*\*\*\*

M-82 3359  
TY172 3360  
\*\*\*\*\*

M-82 3419  
TY172 3420  
\*\*\*\*\*

M-82 3479  
TY172 3480  
\*\*\*\*\*

M-82 3539  
TY172 3540  
\*\*\*\*\*

M-82 3599  
TY172 3600  
\*\*\*\*\*

M-82 TY172 TTAGCATAGTGTGAGTCTCTACTGATTACACAGTTGATAATAGTATTGTTATATTTGT 3659  
TTAGCATAGTGTGAGTCTCTACTGATTACACAGTTGATAATAGTATTGTTATATTTGT 3660  
\*\*\*\*\*

M-82 TY172 TTTGCTTAAAGCTTAGGGGAAGACTCTTTTTTAATGTTGAGAGCAACTTTCTTTTGCAA 3719  
TTTGCTTAAAGCTTAGGGGAAGACTCTTTTTTAATGTTGAGAGCAACTTTCTTTTGCAA 3720  
\*\*\*\*\*

M-82 TY172 TTATGCTATGTGGGTCTTTGCTGATTGTTAACACGGTTTAGCTTGTCAACACAACCTA 3779  
TTATGCTATGTGGGTCTTTGCTGATTGTTAACACGGTTTAGCTTGTCAACACAACCTA 3780  
\*\*\*\*\*

M-82 TY172 CTGGAAGCTGGTTAAATTTTGCTTGTAAATTTCTTGTAGGAAGGTCCTGAGGGAAGCTGCT 3839  
CTGGAAGCTGGTTAAATTTTGCTTGTAAATTTCTTGTAGGAAGGTCCTGAGGGAAGCTGCT 3840  
\*\*\*\*\*

M-82 TY172 TCTGGAGGAAGAGATGCTGAACGAGTGAACTGAAATTGGAAATTAAGTTGAGGTAAGG 3899  
TCTGGAGGAAGAGATGCTGAACGAGTGAACTGAAATTGGAAATTAAGTTGAGGTAAGG 3900  
\*\*\*\*\*

M-82 TY172 ATATATTAGACATCCAGCATCATTAGTTGTGGGGTGCGGCCTTGGTTAGAACTTTGTT 3959  
ATATATTAGACATCCAGCATCATTAGTTGTGGGGTGCGGCCTTGGTTAGAACTTTGTT 3960  
\*\*\*\*\*

M-82 TY172 TTAGCTTCCAGCATAAGGTGTTTTAATATAAATTGAAAGATAAACTTTGAAATCAATTA 4019  
TTAGCTTCCAGCATAAGGTGTTTTAATATAAATTGAAAGATAAACTTTGAAATCAATTA 4020  
\*\*\*\*\*

M-82 TY172 ACTATAGAGAAGAATCTACTAAGGATAGAGAGGAGACTTTTCTTTGTCTTCTTTTCCAA 4079  
ACTATAGAGAAGAATCTACTAAGGATAGAGAGGAGACTTTTCTTTGTCTTCTTTTCCAA 4080  
\*\*\*\*\*

M-82 TY172 TGTGGTCGAGATGAAGTATTTTTGGGCAGTTTGATGAATTTTGAGGATATCAATACAACC 4139  
TGTGGTCGAGATGAAGTATTTTTGGGCAGTTTGATGAATTTTGAGGATATCAATACAACC 4140  
\*\*\*\*\*

M-82 TY172 CGTGTATGACATATGCATGATAAATTGTCACATAACAATGCTCCATTTCTAACTAATCTC 4199  
CGTGTATGACATATGCATGATAAATTGTCACATAACAATGCTCCATTTCTAACTAATCTC 4200  
\*\*\*\*\*

M-82 TY172 AATAAATGCGATGTTGATAGTTTTGTTACCATAGTAATGATGACAATTGTAATGTGACTG 4259  
AATAAATGCGATGTTGATAGTTTTGTTACCATAGTAATGATGACAATTGTAATGTGACTG 4260  
\*\*\*\*\*

M-82 TY172 GAAAGTAGGAAATAGATAGTCTCTTTCTAGAGTTTTTATTTGAATATATTCCTACTCAA 4319  
GAAAGTAGGAAATAGATAGTCTCTTTCTAGAGTTTTTATTTGAATATATTCCTACTCAA 4320  
\*\*\*\*\*

M-82 TY172 TGTGGTATAATATAATCAATTTGGTGTTTTAGAATGTGGAGTATGACAAAGAAGGTTCTG 4379  
TGTGGTATAATATAATCAATTTGGTGTTTTAGAATGTGGAGTATGACAAAGAAGGTTCTG 4380  
\*\*\*\*\*

M-82 TY172 CCTTGCATATTCGCGGAAGAATATTCTGGAGAATGAACATGTAAAGGTGTGTATTCTTC 4439  
CCTTGCATATTCGCGGAAGAATATTCTGGAGAATGAACATGTAAAGGTGTGTATTCTTC 4440  
\*\*\*\*\*

M-82 TY172 AACTTAATCCTTTTGGATAAATTCCTAATATTGATGCTGCAACAAAAATGTATCTAATTA 4499  
AACTTAATCCTTTTGGATAAATTCCTAATATTGATGCTGCAACAAAAATGTATCTAATTA 4500  
\*\*\*\*\*

M-82 TTTTATTGCAGATAGGGGCCCTTTCACACTCTGGAAATTGAGCAACACAGACCTTTTGTGC 4559  
TY172 TTTTATTGCAGATAGGGGCCCTTTCACACTCTGGAAATTGAGCAACACAGACCTTTTGTGC 4560  
\*\*\*\*\*

M-82 TAAGAAAGGTACAATGCTGTGTTTTGATTCTTTTGCAACTATCACTCTGTTTTCTTTTAA 4619  
TY172 TAAGAAAGGTACAATGCTGTGTTTTGATTCTTTTGCAACTATCACTCTGTTTTCTTTTAA 4620  
\*\*\*\*\*

M-82 AAATTTTGAGGTATATTATTTGCACTTTAAAAGCTATCAAGCTGGTGATATATGTTCTTT 4679  
TY172 AAATTTTGAGGTATATTATTTGCACTTTAAAAGCTATCAAGCTGGTGATATATGTTCTTT 4680  
\*\*\*\*\*

M-82 AGGATTGCAGCTCTAACCTATGTTTCTCAGACTCTTCAAAAATGTCAACTGGTGCATGTC 4739  
TY172 AGGATTGCAGCTCTAACCTATGTTTCTCAGACTCTTCAAAAATGTCAACTGGTGCATGTC 4740  
\*\*\*\*\*

M-82 GGATTCTCCAAAATAGCGTGTTTTGGAATATCCGACATGGGTGCGGCATTGTAAGTGAA 4799  
TY172 GGATTCTCCAAAATAGCGTGTTTTGGAATATCCGACATGGGTGCGGCATTGTAAGTGAA 4800  
\*\*\*\*\*

M-82 GAGTCCGCAACTTAGGCTCTAACCAAGTAAAAAATCTGTAAAGTTATTCATGTAATTTAC 4859  
TY172 GAGTCCGCAACTTAGGCTCTAACCAAGTAAAAAATCTGTAAAGTTATTCATGTAATTTAC 4860  
\*\*\*\*\*

M-82 ATTATTATTATAAAAATCCCCGAAAAAGAAGAAGAGTACCTTTTTTTTTCTTTAATAACCT 4919  
TY172 ATTATTATTATAAAAATCCCCGAAAAAGAAGAAGAGTACCTTTTTTTTTCTTTAATAACCT 4920  
\*\*\*\*\*

M-82 TGGTATCCGGGCCAGTTTGTGCACACTTCGACCCTTCCACCAACACAGCTACCGCCTAC 4979  
TY172 TGGTATCCGGGCCAGTTTGTGCACACTTCGACCCTTCCACCAACACAGCTACCGCCTAC 4980  
\*\*\*\*\*

M-82 AGGGTAACTCTTCCATCAAGGTTTTGACAAATAAGAAGAAATTGTCTAGTGTTTTTCGC 5039  
TY172 AGGGTAACTCTTCCATCAAGGTTTTGACAAATAAGAAGAAATTGTCTAGTGTTTTTCGC 5040  
\*\*\*\*\*

M-82 CTCTGGTTGGATTTGAACCTAAGATCTTATGACTCTTAACTCACTTCATTGGCCGCTAGA 5099  
TY172 CTCTGGTTGGATTTGAACCTAAGATCTTATGACTCTTAACTCACTTCATTGGCCGCTAGA 5100  
\*\*\*\*\*

M-82 CCATACCCCTTGGGTGCAGTTACTTGAACTAAGTTAATTTTTCCCGCTAAATTTTCAGT 5159  
TY172 CCATACCCCTTGGGTGCAGTTACTTGAACTAAGTTAATTTTTCCCGCTAAATTTTCAGT 5160  
\*\*\*\*\*

M-82 TGTCCC GCCGCTGACACCCCTTCGAGGCATCTCGTGTTCTGTCTTTGACGTAGTTTAC 5219  
TY172 TGTCCC GCCGCTGACACCCCTTCGAGGCATCTCGTGTTCTGTCTTTGACGTAGTTTAC 5220  
\*\*\*\*\*

M-82 ATCCTGCACGAAAGGTGTACATACGATACCTCCTTTCTGTCTCTAGATGGAACAACCCCTT 5279  
TY172 ATCCTGCACGAAAGGTGTACATACGATACCTCCTTTCTGTCTCTAGATGGAACAACCCCTT 5280  
\*\*\*\*\*

M-82 CTACATTAATGATGATTCCACCTTGGTTATCATCATGACTAATTCCATGCCAAATAAGCC 5339  
TY172 CTACATTAATGATGATTCCACCTTGGTTATCATCATGACTAATTCCATGCCAAATAAGCC 5340  
\*\*\*\*\*

M-82 AAGAAATAGCTACACATTTTCGGCACACACCAAAAAAGGGAACCCGAAGTATATTGTGCGT 5399  
TY172 AAGAAATAGCTACACATTTTCGGCACACACCAAAAAAGGGAACCCGAAGTATATTGTGCGT 5400  
\*\*\*\*\*

|       |                                                                |      |
|-------|----------------------------------------------------------------|------|
| M-82  | TGATTTCTCATAAACAAGTGTACAATGGTTCGAAAATTATCCGAAAGCATTAAATGCTTAT  | 5459 |
| TY172 | TGATTTCTCATAAACAAGTGTACAATGGTTCGAAAATTATCCGAAAGCATTAAATGCTTAT  | 5460 |
|       | *****                                                          |      |
| M-82  | TAAGCTATTATTAACCTCTATATTATACATTCTATGGACTTTGGTCTGAGGGGGCTAGTT   | 5519 |
| TY172 | TAAGCTATTATTAACCTCTATATTATACATTCTATGGACTTTGGTCTGAGGGGGCTAGTT   | 5520 |
|       | *****                                                          |      |
| M-82  | TCTTTTCTCAGCTTGTTTCTTTGTAGTTTGAAGGATCTATGCCCCCTAGTTCGTCCAACA   | 5579 |
| TY172 | TCTTTTCTCAGCTTGTTTCTTTGTAGTTTGAAGGATCTATGCCCCCTAGTTCGTCCAACA   | 5580 |
|       | *****                                                          |      |
| M-82  | CAGGTAGGGCTGAGGCATGATAAGATAAGTGACGGTTTGTGTAGCCTAGGTAATATATAC   | 5639 |
| TY172 | CAGGTAGGGCTGAGGCATGATAAGATAAGTGACGGTTTGTGTAGCCTAGGTAATATATAC   | 5640 |
|       | *****                                                          |      |
| M-82  | TTAAGTGATGCAACAATATAAGTTCAGGTAGGGGAAATTCTTCTCGTACACATAGGAGTA   | 5699 |
| TY172 | TTAAGTGATGCAACAATATAAGTTCAGGTAGGGGAAATTCTTCTCGTACACATAGGAGTA   | 5700 |
|       | *****                                                          |      |
| M-82  | CATGGAATTTGGTAAGATTTCTTGATTTTTTCTGCATTATACAAAGTTGCTGCATAGAT    | 5759 |
| TY172 | CATGGAATTTGGTAAGATTTCTTGATTTTTTCTGCATTATACAAAGTTGCTGCATAGAT    | 5760 |
|       | *****                                                          |      |
| M-82  | TAAGTATAACTAAATAAGTGTCTTTTTATAATTAGAGGCTAATGAGTCATAGAAGTTGAA   | 5819 |
| TY172 | TAAGTATAACTAAATAAGTGTCTTTTTATAATTAGAGGCTAATGAGTCATAGAAGTTGAA   | 5820 |
|       | *****                                                          |      |
| M-82  | TTAGGAGATAATCATTGTAGTTGTAAGTTCATAGGAAATTGAGGAGTATCC            | 5879 |
| TY172 | TTAGGAGATAATCATTGTAGTTGTAAGTTCATAGGAAATTGAGGAGTATCC            | 5880 |
|       | *****                                                          |      |
| M-82  | CAATCGAAATATAAATGCCTAAAAATGTCTGGGCTAAGAATTACATGTGAACTTGATGTC   | 5939 |
| TY172 | CAATCGAAATATAAATGCCTAAAAATGTCTGGGCTAAGAATTACATGTGAACTTGATGTC   | 5940 |
|       | *****                                                          |      |
| M-82  | TGGGCTAAGAATTACATGTGAACTTGAAATTATATTGATCGGGTACAGGTCGAATGAAAT   | 5999 |
| TY172 | TGGGCTAAGAATTACATGTGAACTTGAAATTATATTGATCGGGTACAGGTCGAATGAAAT   | 6000 |
|       | *****                                                          |      |
| M-82  | TTTCCATAATTTCTTTTACTACTGGATTTATTACTTAAAAGGGTATAAACTTATCAAAAT   | 6059 |
| TY172 | TTTCCATAATTTCTTTTACTACTGGATTTATTACTTAAAAGGGTATAAACTTATCAAAAT   | 6060 |
|       | *****                                                          |      |
| M-82  | AAGATTTCTTAGAAGGTATGCGTGCTTTTATTTAAAACCTTTTGTATTATGTATAATCCTAT | 6119 |
| TY172 | AAGATTTCTTAGAAGGTATGCGTGCTTTTATTTAAAACCTTTTGTATTATGTATAATCCTAT | 6120 |
|       | *****                                                          |      |
| M-82  | CTAATGCATGTACATGAATTATTTTGAATTTATTTTACTCAAAGTAATCGTTATTTTCC    | 6179 |
| TY172 | CTAATGCATGTACATGAATTATTTTGAATTTATTTTACTCAAAGTAATCGTTATTTTCC    | 6180 |
|       | *****                                                          |      |
| M-82  | TGTGTCATCTTCCTTATTATTTTTGTATATTCTATTTGTTTAGCAAATATATGAGCATCT   | 6239 |
| TY172 | TGTGTCATCTTCCTTATTATTTTTGTATATTCTATTTGTTTAGCAAATATATGAGCATCT   | 6240 |
|       | *****                                                          |      |
| M-82  | TGTTTGTTC AATCTTAGTCTTACCTGAACATAGTTGATTTATACGAAAGCTTATACATA   | 6299 |
| TY172 | TGTTTGTTC AATCTTAGTCTTACCTGAACATAGTTGATTTATACGAAAGCTTATACATA   | 6300 |
|       | *****                                                          |      |

M-82 TY172 TATGAGTCTGACTTGCATTATCTGATTTAGGTGGTCTGGGACTCACTGGCACGGGAGGT 6359  
TATGAGTCTGACTTGCATTATCTGATTTAGGTGGTCTGGGACTCACTGGCACGGGAGGT 6360  
\*\*\*\*\*

M-82 TY172 TCTTCGTCAAGCTTCTGGTATTTTTACAGTGCACCTTAACAAAGTTATATTTTTATTG 6419  
TCTTCGTCAAGCTTCTGGTATTTTTACAGTGCACCTTAACAAAGTTATATTTTTATTG 6420  
\*\*\*\*\*

M-82 TY172 TTCAAGTGTGGCATTAACTTTATCTGCAATATTAGGCATTTTAGTTCATAGCCTGACTT 6479  
TTCAAGTGTGGCATTAACTTTATCTGCAATATTAGGCATTTTAGTTCATAGCCTGACTT 6480  
\*\*\*\*\*

M-82 TY172 TTCATCCATAACTTATCAAGTCTATAACATGTTGCTGCTTCTTTTTAGTACATTGACAT 6539  
TTCATCCATAACTTATCAAGTCTATAACATGTTGCTGCTTCTTTTTAGTACATTGACAT 6540  
\*\*\*\*\*

M-82 TY172 GATTGTGAAACCACTTTATAGGTGCATTATTCTTAGATGGATTGTTTCAGTCTAGGTGTC 6599  
GATTGTGAAACCACTTTATAGGTGCATTATTCTTAGATGGATTGTTTCAGTCTAGGTGTC 6600  
\*\*\*\*\*

M-82 TY172 TTTTAGCCCTTATGTTGCAGAGGTTTTCTTCTTTACTCGTACACTTGCAGTGAGAACATG 6659  
TTTTAGCCCTTATGTTGCAGAGGTTTTCTTCTTTACTCGTACACTTGCAGTGAGAACATG 6660  
\*\*\*\*\*

M-82 TY172 ATTATTCGCTGCAAGTACATGTGTGTTGCAGAGTGCTTTTGAAGTATGAGAAGTTTCCT 6719  
ATTATTCGCTGCAAGTACATGTGTGTTGCAGAGTGCTTTTGAAGTATGAGAAGTTTCCT 6720  
\*\*\*\*\*

M-82 TY172 ATATAATTGTTGATATTCAGCTATATTGATTCCAACATGGATATGTGTTTGTAACTTTGT 6779  
ATATAATTGTTGATATTCAGCTATATTGATTCCAACATGGATATGTGTTTGTAACTTTGT 6780  
\*\*\*\*\*

M-82 TY172 ACTGCTCTTAGATTTACCGTTTTCAATATGCTGAATACGGTTTTCTTTTTGATGATTGAG 6839  
ACTGCTCTTAGATTTACCGTTTTCAATATGCTGAATACGGTTTTCTTTTTGATGATTGAG 6840  
\*\*\*\*\*

M-82 TY172 ATCCATCTGCAAGTGCATGATCTGGCTGTGGTCTGATGCAAGAAGGATTGGCACACATTC 6899  
ATCCATCTGCAAGTGCATGATCTGGCTGTGGTCTGATGCAAGAAGGATTGGCACACATTC 6900  
\*\*\*\*\*

M-82 TY172 TTCTTATTGGTAAAAGGTAAGCTTGACAATCTCATAGTCCTATGAATACAAGTTTTAAAC 6959  
TTCTTATTGGTAAAAGGTAAGCTTGACAATCTCATAGTCCTATGAATACAAGTTTTAAAC 6960  
\*\*\*\*\*

M-82 TY172 AGATCTTGAGCATCTCCTTTTTCTTGTATTTAAACGAGATGTAATAGTTTAAAAGTCGAAT 7019  
AGATCTTGAGCATCTCCTTTTTCTTGTATTTAAACGAGATGTAATAGTTTAAAAGTCGAAT 7020  
\*\*\*\*\*

M-82 TY172 GATTATGTCAGAATTTCTATATGTTGAGGCTGAGTTAAGTGTTAACTAGATTGTATGGCA 7079  
GATTATGTCAGAATTTCTATATGTTGAGGCTGAGTTAAGTGTTAACTAGATTGTATGGCA 7080  
\*\*\*\*\*

M-82 TY172 TAATTTTACCTTATGTACTTGTTACTGTTGTCTGAACAGTGTGACTATCACCCGTTCTCG 7139  
TAATTTTACCTTATGTACTTGTTACTGTTGTCTGAACAGTGTGACTATCACCCGTTCTCG 7140  
\*\*\*\*\*

M-82 TY172 TATAGAGTCTTCTATACCGCGCAAGCATGGACCGGCTATTGCAGGTTATGATAAGGTGAG 7199  
TATAGAGTCTTCTATACCGCGCAAGCATGGACCGGCTATTGCAGGTTATGATAAGGTGAG 7200  
\*\*\*\*\*

|       |                                                               |      |
|-------|---------------------------------------------------------------|------|
| M-82  | TCTCTTACTTCTTTTTGTTTCATCTTTTGTATAATTTAATTATTTTGAACATGACGTCAA  | 7259 |
| TY172 | TCTCTTACTTCTTTTTGTTTCATCTTTTGTATAATTTAATTATTTTGAACATGACGTCAA  | 7260 |
|       | *****                                                         |      |
| M-82  | GTGAAATTGTGTTCTTAATTTTGATTTGCAGGCGTTAAATAAATTCTTTGACAATGTTCT  | 7319 |
| TY172 | GTGAAATTGTGTTCTTAATTTTGATTTGCAGGCGTTAAATAAATTCTTTGACAATGTTCT  | 7320 |
|       | *****                                                         |      |
| M-82  | ACAGGTAGACTTTTGTCAACTTTCTTGATGTTGCTTAATTTCCAGAAGCAATATGTTATA  | 7379 |
| TY172 | ACAGGTAGACTTTTGTCAACTTTCTTGATGTTGCTTAATTTCCAGAAGCAATATGTTATA  | 7380 |
|       | *****                                                         |      |
| M-82  | GGTTCCTATTTCTGTTGCAGGCCTTTGTCAAGCATGTTGATTTCAAAGTAGTTCGCTGTG  | 7439 |
| TY172 | GGTTCCTATTTCTGTTGCAGGCCTTTGTCAAGCATGTTGATTTCAAAGTAGTTCGCTGTG  | 7440 |
|       | *****                                                         |      |
| M-82  | CTGTGATTGCAAGTCCAGGATTCACCAAGGTATTTTTTGTATAGTTACACTTCTTAGCTA  | 7499 |
| TY172 | CTGTGATTGCAAGTCCAGGATTCACCAAGGTATTTTTTGTATAGTTACACTTCTTAGCTA  | 7500 |
|       | *****                                                         |      |
| M-82  | GTCATACTTTTATGCTATGTTACAAGGGGTAGAAGTTCATATCTAATTATATCTGTACT   | 7559 |
| TY172 | GTCATACTTTTATGCTATGTTACAAGGGGTAGAAGTTCATATCTAATTATATCTGTACT   | 7560 |
|       | *****                                                         |      |
| M-82  | ATGCATATGTTAATTCAGTTGTGACATTTAAACTTTTTTGTGTTGAATGTGCAGGATCAG  | 7619 |
| TY172 | ATGCATATGTTAATTCAGTTGTGACATTTAAACTTTTTTGTGTTGAATGTGCAGGATCAG  | 7620 |
|       | *****                                                         |      |
| M-82  | TTTCATCGTCACCTGTTGTTGGAAGCCGAGAGGAAGCAACTAAGACCTATAATAGAAAAT  | 7679 |
| TY172 | TTTCATCGTCACCTGTTGTTGGAAGCCGAGAGGAAGCAACTAAGACCTATAATAGAAAAT  | 7680 |
|       | *****                                                         |      |
| M-82  | AAGTCACGCATAATTCTTGTCCATAACAACCTCGGGATACAAGTATGCCCTTCTTTCTCTC | 7739 |
| TY172 | AAGTCACGCATAATTCTTGTCCATAACAACCTCGGGATACAAGTATGCCCTTCTTTCTCTC | 7740 |
|       | *****                                                         |      |
| M-82  | TCTCCTTGCCCTTCATCTGACATCTCAAACGAGTCAATACATTTTTTGTGCAAACCATAT  | 7799 |
| TY172 | TCTCCTTGCCCTTCATCTGACATCTCAAACGAGTCAATACATTTTTTGTGCAAACCATAT  | 7800 |
|       | *****                                                         |      |
| M-82  | GATGTTAGACATGCGTGCTAGTCTAAAATTGACTAATATGTAGCAATACATTTTTTGTGTA | 7859 |
| TY172 | GATGTTAGACATGCGTGCTAGTCTAAAATTGACTAATATGTAGCAATACATTTTTTGTGTA | 7860 |
|       | *****                                                         |      |
| M-82  | CGCGATTCTCTCGTCAGTACTGCTATTTTAGTACAAATCGCCTTTATTATTTGTCTATTG  | 7919 |
| TY172 | CGCGATTCTCTCGTCAGTACTGCTATTTTAGTACAAATCGCCTTTATTATTTGTCTATTG  | 7920 |
|       | *****                                                         |      |
| M-82  | TAGTTGATATGTAAGGTTCAATTATTATCCAGCACGGGTGTTTAAGGCCGAGAGTTTTT   | 7979 |
| TY172 | TAGTTGATATGTAAGGTTCAATTATTATCCAGCACGGGTGTTTAAGGCCGAGAGTTTTT   | 7980 |
|       | *****                                                         |      |
| M-82  | TTTTTCCCTCGTTTTACAGACATAGTTTGAAGAGGTTATGGATGCCCCAAATGTAATGA   | 8039 |
| TY172 | TTTTTCCCTCGTTTTACAGACATAGTTTGAAGAGGTTATGGATGCCCCAAATGTAATGA   | 8040 |
|       | *****                                                         |      |
| M-82  | CTATGATAAAAGATACAAAAGCTGCCAAAGAGGTACCTTCTGACCCTTGTCCAACCTGAT  | 8099 |
| TY172 | CTATGATAAAAGATACAAAAGCTGCCAAAGAGGTACCTTCTGACCCTTGTCCAACCTGAT  | 8100 |
|       | *****                                                         |      |

M-82 ATGATCTTTAATCTTTATTCTTGTGTTTGTTC AAGTCTTTTTTCGTATTTTTTGGGAATA 8159  
TY172 ATGATCTTTAATCTTTATTCTTGTGTTTGTTC AAGTCTTTTTTCGTATTTTTTGGGAATA 8160  
\*\*\*\*\*

M-82 ACTGTTTTCCTTTCTCTTCCAATCTTAATCAGGT TCAAGCCCTAAAGGATTTTTTCAACA 8219  
TY172 ACTGTTTTCCTTTCTCTTCCAATCTTAATCAGGT TCAAGCCCTAAAGGATTTTTTCAACA 8220  
\*\*\*\*\*

M-82 TGCTTTCAAATGTTAGGTTCTATCCTTGGTCTCAATGTTCTATTTATATTTTTCTTAATA 8279  
TY172 TGCTTTCAAATGTTAGGTTCTATCCTTGGTCTCAATGTTCTATTTATATTTTTCTTAATA 8280  
\*\*\*\*\*

M-82 ACTTTGGATGTTTCAGATTTTTATCTATCATATGCTAAGAGTAAACACAGATTGTTTGGT 8339  
TY172 ACTTTGGATGTTTCAGATTTTTATCTATCATATGCTAAGAGTAAACACAGATTGTTTGGT 8340  
\*\*\*\*\*

M-82 TTTGAATTTATTTGTTTGCTTTTTTTTGGTGT TTTATCGGTTATCTTGGGTTCTGTAAGAGG 8399  
TY172 TTTGAATTTATTTGTTTGCTTTTTTTTGGTGT TTTATCGGTTATCTTGGGTTCTGTAAGAGG 8400  
\*\*\*\*\*

M-82 CCTGAGAGTTTCAAATAAAAGTTTGAGGTGTTTAACTATGCATGACGGATATCCCTGTTT 8459  
TY172 CCTGAGAGTTTCAAATAAAAGTTTGAGGTGTTTAACTATGCATGACGGATATCCCTGTTT 8460  
\*\*\*\*\*

M-82 AAGGAGAGGTGGACTAATCTGAAATATTTCTAGATTAAGAACAGATACGTTGTGTTATGA 8519  
TY172 AAGGAGAGGTGGACTAATCTGAAATATTTCTAGATTAAGAACAGATACGTTGTGTTATGA 8520  
\*\*\*\*\*

M-82 TGGGCAGCTGGTGATATTGTTATCTCTGCGTGTGCCTTTTTTTTAGGCCTTTCTACCAATT 8579  
TY172 TGGGCAGCTGGTGATATTGTTATCTCTGCGTGTGCCTTTTTTTTAGGCCTTTCTACCAATT 8580  
\*\*\*\*\*

M-82 GAATGCTGAAAATTCATTTGCAACCAACCTTGGTTGAATTTATTTTCAGCAAGGATCCGT 8639  
TY172 GAATGCTGAAAATTCATTTGCAACCAACCTTGGTTGAATTTATTTTCAGCAAGGATCCGT 8640  
\*\*\*\*\*

M-82 CATAATTCAGATATCCAATCATCAACAACCTTGAACCTTCTATTAAATTTTAGGGCATC 8699  
TY172 CATAATTCAGATATCCAATCATCAACAACCTTGAACCTTCTATTAAATTTTAGGGCATC 8700  
\*\*\*\*\*

M-82 TCAGTTGTGTTCTTTCATCTTTTGATTTTATATGCAATTTTACTGTAGTAATAGGAGTAT 8759  
TY172 TCAGTTGTGTTCTTTCATCTTTTGATTTTATATGCAATTTTACTGTAGTAATAGGAGTAT 8760  
\*\*\*\*\*

M-82 CTCTCTTCAATGCTTTGGCCATATCGGTACGAGAGAATTTATCATCTGATGTGCCCTCTC 8819  
TY172 CTCTCTTCAATGCTTTGGCCATATCGGTACGAGAGAATTTATCATCTGATGTGCCCTCTC 8820  
\*\*\*\*\*

M-82 CTTTACTTTTTTGCAGACAGAAAATACGATAAGGAAGTCTTAATTA AAAATATGCGTGTG 8879  
TY172 CTTTACTTTTTTGCAGACAGAAAATACGATAAGGAAGTCTTAATTA AAAATATGCGTGTG 8880  
\*\*\*\*\*

M-82 CTTGATTTTCTGGTTTTAAGGATATTTAGGTCTAAAAACTATAGTTACATTACATAATTT 8939  
TY172 CTTGATTTTCTGGTTTTAAGGATATTTAGGTCTAAAAACTATAGTTACATTACATAATTT 8940  
\*\*\*\*\*

M-82 AGGGATGCTAGATGTAGAGGTCTTTTGCTAGAGCGAGTGCTTGTTTGAACCCCCGCCCC 8999  
TY172 AGGGATGCTAGATGTAGAGGTCTTTTGCTAGAGCGAGTGCTTGTTTGAACCCCCGCCCC 9000  
\*\*\*\*\*

M-82 TY172 GCCCCGCATATTTTCATGAATTATGATATTAATTGGATATTTATGATACCGCTTTTCAAGC 9059  
 GCCCCGCATATTTTCATGAATTATGATATTAATTGGATATTTATGATACCGCTTTTCAAGC 9060  
 \*\*\*\*\*

M-82 TY172 TTTCTGAAGAACTAAGAAGGATAACATCTTTATTTAAAACTTTTTTCCCTCTCTTGTT 9119  
 TTTCTGAAGAACTAAGAAGGATAACATCTTTATTTAAAACTTTTTTCCCTCTCTTGTT 9120  
 \*\*\*\*\*

M-82 TY172 ATAACTTCTTGCAATAAATGTAGTCATGTCCCTTTTTTCTGGATCTCTTAACATTTATATT 9179  
 ATAACTTCTTGCAATAAATGTAGTCATGTCCCTTTTTTCTGGATCTCTTAACATTTATATT 9180  
 \*\*\*\*\*

M-82 TY172 AATGAGCCCCTGCATGAAGTTTACTTCCAGTTGTCAACAAATAGATCCTTGTAGTGTGTT 9239  
 AATGAGCCCCTGCATGAAGTTTACTTCCAGTTGTCAACAAATAGATCCTTGTAGTGTGTT 9240  
 \*\*\*\*\*

M-82 TY172 TCTTTACCCGAACTTGTGAAAATTGAAGTTACTTTATTTGGACTTCTCTAGGATCCTGA 9299  
 TCTTTACCCGAACTTGTGAAAATTGAAGTTACTTTATTTGGACTTCTCTAGGATCCTGA 9300  
 \*\*\*\*\*

M-82 TY172 TCGTGCATGCTATGGACCAAAGCATGTTGAAGTTGCCCATGAGCGTCTGGCTATTCAGAC 9359  
 TCGTGCATGCTATGGACCAAAGCATGTTGAAGTTGCCCATGAGCGTCTGGCTATTCAGAC 9360  
 \*\*\*\*\*

M-82 TY172 ACTTCTCATTACTGACGAGCTCTTTAGGTGAGTATCTTATGGTCCCAGGTTAATGGGGGC 9419  
 ACTTCTCATTACTGACGAGCTCTTTAGGTGAGTATCTTATGGTCCCAGGTTAATGGGGGC 9420  
 \*\*\*\*\*

M-82 TY172 TTTATGAGCAATAAAATTAAGTGTATATAGCTTGTATATAAATTTGCAACTCGTGGCATA 9479  
 TTTATGAGCAATAAAATTAAGTGTATATAGCTTGTATATAAATTTGCAACTCGTGGCATA 9480  
 \*\*\*\*\*

M-82 TY172 TTTCAAGTTCATAAGTATCTCTTTTTACGTGCTTAGCTTTTAAAATCGACATCTTTGGTT 9539  
 TTTCAAGTTCATAAGTATCTCTTTTTACGTGCTTAGCTTTTAAAATCGACATCTTTGGTT 9540  
 \*\*\*\*\*

M-82 TY172 CATAGGATAATATGTAAACATGTATAACTATCTTCAAATCTCAACCAGTTATGTATGGGC 9599  
 CATAGGATAATATGTAAACATGTATAACTATCTTCAAATCTCAACCAGTTATGTATGGGC 9600  
 \*\*\*\*\*

M-82 TY172 CATTTCACTCGTGTGTATATATATAGTTGGTTGATATCGTACATGAGAAATATCCAAC 9659  
 CATTTCACTCGTGTGTATATATATAGTTGGTTGATATCGTACATGAGAAATATCCAAC 9660  
 \*\*\*\*\*

M-82 TY172 TCTTTTGATCTGTTGACAGGAGTTCTGATGTAGAAACGAGGAAAAAGTATGCTAATTTGG 9719  
 TCTTTTGATCTGTTGACAGGAGTTCTGATGTAGAAACGAGGAAAAAGTATGCTAATTTGG 9720  
 \*\*\*\*\*

M-82 TY172 TCGATTCAGTCAAGGATTCAGGTGGTACTGCTCTCATTTTCTCGTCAATGCATGTCTCCG 9779  
 TCGATTCAGTCAAGGATTCAGGTGGTACTGCTCTCATTTTCTCGTCAATGCATGTCTCCG 9780  
 \*\*\*\*\*

M-82 TY172 GAGAACGTGAGTATATAACAATTCCTGTAAATTTCTTTTTTCCCTCCCAGCATTTTCATCTCT 9839  
 GAGAACGTGAGTATATAACAATTCCTGTAAATTTCTTTTTTCCCTCCCAGCATTTTCATCTCT 9840  
 \*\*\*\*\*

M-82 TY172 GCCTTTCCCTGTCGCCCCCTAGTAATGCTTAGAATGGTATTTTCCCTTCTGTGCACATATT 9899  
 GCCTTTCCCTGTCGCCCCCTAGTAATGCTTAGAATGGTATTTTCCCTTCTGTGCACATATT 9900  
 \*\*\*\*\*

M-82 CATTGTCCCATAGTCGCTTCAAATCCTTTTTCTTCCTACGAACACACGTTCTTTACTGC 9959  
TY172 CATTGTCCCATAGTCGCTTCAAATCCTTTTTCTTCCTACGAACACACGTTCTTTACTGC 9960  
\*\*\*\*\*

M-82 ATATTTGTCAAGGCTGATTAAAACAACCTTTGGTTTTTCGTACAGAAATTGAATCAGCTAA 10019  
TY172 ATATTTGTCAAGGCTGATTAAAACAACCTTTGGTTTTTCGTACAGAAATTGAATCAGCTAA 10020  
\*\*\*\*\*

M-82 CCGGCATTGCTGCAATCCTTCGTTTTCTTTGCCGGAGCTGGAAGACATTGAGATGTGAT 10079  
TY172 CCGGCATTGCTGCAATCCTTCGTTTTCTTTGCCGGAGCTGGAAGACATTGAGATGTGAT 10080  
\*\*\*\*\*

M-82 GGATGAAATGATCGTTCATCGGTAATGAATGTTATCTGCACTGTTAAAAATGTGACTATT 10139  
TY172 GGATGAAATGATCGTTCATCGGTAATGAATGTTATCTGCACTGTTAAAAATGTGACTATT 10140  
\*\*\*\*\*

M-82 CACTATAAAATGAAGTGAATACACAGAACTGTAATGTTTTTCTAGCAGTGAAGTAACA 10199  
TY172 CACTATAAAATGAAGTGAATACACAGAACTGTAATGTTTTTCTAGCAGTGAAGTAACA 10200  
\*\*\*\*\*

M-82 TCATCGACTGATGTTGCGTATCGCGTGTGTATATTCGTTTTTTTTTTTTTTACTAATTG 10259  
TY172 TCATCGACTGATGTTGCGTATCGCGTGTGTATATTCGTTTTTTTTTTTTTTACTAATTG 10260  
\*\*\*\*\*

M-82 AAATGTAATATATCGTCGATTATCGAGGTGACTATATCAGTGTAAACGATATTTTTCATC 10319  
TY172 AAATGTAATATATCGTCGATTATCGAGGTGACTATATCAGTGTAAACGATATTTTTCATC 10320  
\*\*\*\*\*

M-82 GAATATGTTGGCTTTTAGATAAAGTTTTCTGGTTGTTTCAT 10359  
TY172 GAATATGTTGGCTTTTAGATAAAGTTTTCTGGTTGTTTCAT 10360  
\*\*\*\*\*
