# Supplementary material for: A Novel Route Controlling Begomovirus Resistance by the Messenger RNA Surveillance Factor Pelota
Source: PubMed Central journal article supplement (PMC4598160; doi:10.1371/journal.pgen.1005538), 2015-10-08
Supplement: pgen.1005538.s007.pdf [file pgen.1005538.s007.pdf]

**S1 Table.** DNA markers displaying polymorphisms between the resistant line TY172 and the susceptible counterpart M-82, on tomato chromosome 4. Markers are displayed according to their approximate distance in Kb from *Nac1*.

| Marker              | Distance from <i>Nac1</i> (Kb) | Forward (F) and Reverse (R) primers                            | Restriction enzyme |
|---------------------|--------------------------------|----------------------------------------------------------------|--------------------|
| <i>Nac1</i>         | 0                              | F- TGCCTGGTTTCTGCTGTCA<br>R- TAAAGCTGAAGAAGGACTTACCCT          | <i>TaqI</i>        |
| 31                  | 6                              | F- TTCCATTGACACTTGTCTGAG<br>R- CCGTTTGTATAACGATAAGGGC          | <i>HinfI</i>       |
| 22                  | 6.7                            | F- CCCTTATCGTTATACAAACGGC<br>R- TTTGTGCGAGAATTGATGAGAG         | <i>HinfI</i>       |
| 41                  | 7.6                            | F- ATCTAATTCCATCCGGTGGTC<br>R- TCCATAAGCTTCCTTGTGTTG           | <i>PmlI</i>        |
| 34                  | 8.7                            | F- CAGTTGCTCGTGTGTTTTGTTC<br>R- GCGCTCTATAGCTACGGTTTTG         | <i>AclI</i>        |
| 25                  | 18.5                           | F- ATTGCTTCTAAAGTCTGGCAGG<br>R- TTTAGCTTTAAGGGGTCGTTTG         | <i>TspRI</i>       |
| 1.8                 | 33.2                           | F- CCTTGACAATCAACAATGCTTC<br>R- TCACGTGTGTGATTTATGCTTG         | <i>AluI</i>        |
| <i>RP5</i>          | 184.3                          | F- ATTCCTCTTCAATAGGTCCACG<br>R- GTCTCATCTGTTCCGAGTCC           | <i>AluI</i>        |
| <i>RP3</i>          | 186.5                          | F- CAAACTCTCCCATGCTTCTTTC<br>R- TCATTCCGGGAAATTAACCTACG        | <i>BglII</i>       |
| 7.4                 | 218.7                          | F- GTGAATTATCATGGCACCATTC<br>R- TATGAAGCTACGATATCCGGG          | <i>EarI</i>        |
| <i>DJ</i>           | 220.7                          | F- ATAGTTCAAGAAAAGTCGAACC<br>R- CGAATTAATAATCATGAAACAATG       | PCR                |
| <i>Ring</i>         | 231.7                          | F- GTTCATGATGGAGTAGAAGAAGAAG<br>R- CTTAGTCAACCCTCTTTAGGTTGC    | <i>MnlI</i>        |
| 4.4                 | 249.9                          | F- AAAATTTAAGGAATCCCATAGCG<br>R- TTTGAAATATCTTATGTTTGTTCGG     | <i>AflIII</i>      |
| <i>Pelo</i>         | 268.2                          | F- AAATTTGTTTCATTCAATATGAAGATTGT<br>R- CGTTTTCTTCATCTGGGGT     | McSNP              |
| 4.8                 | 270.7                          | F- GGTTCTTTTGAGCTATAACTCTGC<br>R- ATATTGGGCCAACCATAACTTC       | <i>RsaI</i>        |
| 9.4                 | 271.6                          | F- AATTAATGTGAGACGGAGCCAG<br>R- CCAAGTCACATGGTAAATGCAG         | <i>AseI</i>        |
| 5.4                 | 273.9                          | F- CAAATATGTCAATGGATGGTGG<br>R- AAGGTGCGGTGGATTATTAAG          | <i>HphI</i>        |
| 3.1                 | 291.6                          | F- GTAAATAAAGCACAAATGCCCC<br>R- AATTGTTGTGCCACCACTAGAC         | <i>CviKI</i>       |
| 9.8                 | 301.3                          | F- TAACGAACACCAACTGTTTCGAC<br>R- ATCATTTCCTTACCATTAC           | <i>NlaIV</i>       |
| 0.1                 | 316.2                          | F- CTAGCCTCTGTGTAAGATCGGG<br>R- TCAAAACATCTCAAACGACCTC         | <i>BsaAI</i>       |
| 0.3                 | 333.3                          | F- CCAGTGATAATGATGGATGTGG<br>R- ATGGAAAAATGATGGGACTACG         | <i>BceI</i>        |
| 0.4                 | 340.8                          | F- TGCTATTGACTTTTCCACTTGC<br>R- TTGAATTTACGTCATTGGC            | <i>HinfI/ClaI</i>  |
| 0.5                 | 348.9                          | F- TTCATATTGATCACTTGCGGTC<br>R- ATTTGGCTAATGGAATCTCCTG         | <i>AvaII</i>       |
| 5.8                 | 351                            | F- CTTGTAAACCCATGTGGTAGGG<br>R- AACGTGTGAGTGAAGCAAAAAG         | <i>BglII</i>       |
| 3.8                 | 579.3                          | F- TTTTACCTCGGGAGCTAGGAG<br>R- GCCGAGATAACATTAGTGGTGAC         | <i>HphI</i>        |
| 4.9                 | 693                            | F- AGTGCCACGTAAGCTAAAAAGG<br>R- AAGTTGATCCAATTCAAGCTGC         | <i>BstUI</i>       |
| <i>C2_At5g37360</i> | 43,552                         | F- AGCTCATGAATGCTTATTGTGAC<br>R- ACCATATTAAGAGTAAACTTTTACAAATG | <i>TaqI</i>        |
